# Supplementary material for: AgNPs decorated Mg-doped ZnO heterostructure with dramatic SERS activity for trace detection of food contaminants
Source: Royal Society of Chemistry journal article supplement (doi:10.1039/c8tc06588h), 2019-01-01
Supplement: c8tc06588h1.pdf [file c8tc06588h1.pdf]

## Supplementary Material

# Ag NPs Decorated Mg-Doped ZnO Nanostructure Heterostructure with Dramatic SERS Activity for Trace Detection Food Contaminants

Jiacheng Yao,<sup>a, b, c</sup> Yingnan Quan,<sup>a, b, c</sup> Ming Gao,<sup>a, b, c\*</sup> Renxian Gao,<sup>a, b, c</sup> Lei Chen,<sup>a, b, c</sup> Yang Liu,<sup>a, b, c</sup> Jihui Lang,<sup>a, b, c</sup> He Shen,<sup>a, b, c</sup> Yongjun Zhang,<sup>a, b, c</sup> Lili Yang,<sup>a, b, c</sup> and Jinghai Yang<sup>a, b, c\*</sup>

a. National Demonstration Centre for Experimental Physics Education, Jilin Normal University, Siping,  
136000, P. R. China

b. Key Laboratory of Functional Materials Physics and Chemistry of the Ministry of Education, Jilin Normal  
University, Changchun, 130103, P. R. China

c. Key Laboratory of Preparation and Application of Environmental Friendly Materials, Jilin Normal  
University, Ministry of Education, Changchun, 130103, P. R. China

**Figure S1**

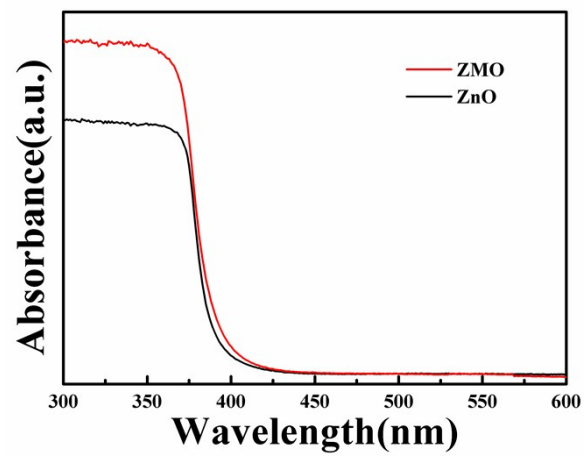

Figure S1. UV-vis reflectance absorption spectra of ZnO and 10%Mg doped ZnO.

**Figure S2**

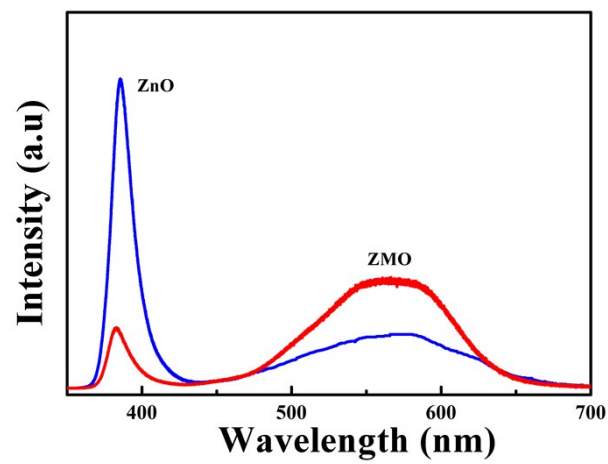

Figure S2. PL spectra of ZnO and 10%Mg doped ZnO.

**Figure S3**

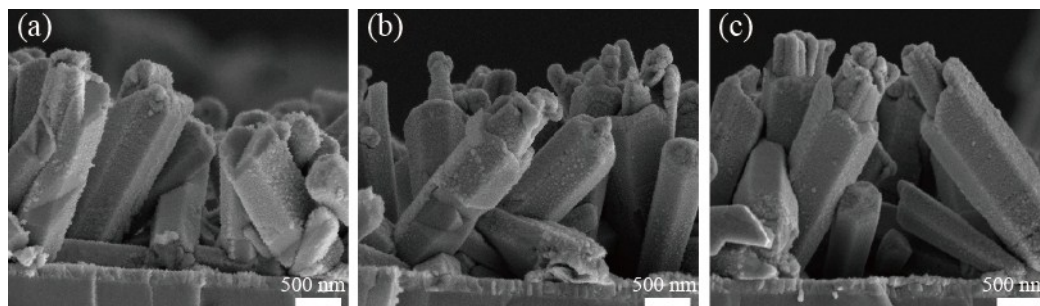

Figure S3. SEM images of ZMOA synthesized at different growth times (a) 6 h; (b) 9 h; and (c) 12 h.

**Figure S4**

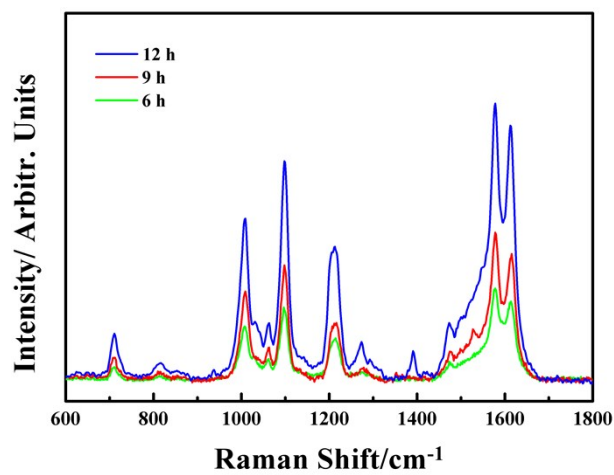

Figure S4. SERS spectrum of 4-MPY adsorbed on ZMOA at different growth times 6, 9, and 12 h.

## Estimation of the enhancement factor

The SERS enhancement factor is determined as follows:

$$EF = \frac{I_{SERS}}{I_{Bulk}} \frac{N_{Bulk}}{N_{SERS}} = \frac{I_{SERS}}{I_{Bulk}} \times \frac{S_{laser} \times h \times C \times N_A}{S_{laser} / S_{MPY}}$$

where  $I_{SERS}$  and  $I_{Bulk}$  represent the intensities of 4-MPY in the surface enhanced Raman spectra and Raman spectra respectively, and  $N_{SERS}$  and  $N_{Bulk}$  represent the corresponding number of molecules in the surface enhanced Raman spectra and Raman spectra, respectively.  $S_{laser}$  is laser spot size of 1  $\mu\text{m}$ .  $C$  is the corresponding concentration of 4-MPY used in the Raman spectra of 10.8 M (using the density 1.2  $\text{g}/\text{cm}^3$  and molar mass 111.16  $\text{g}/\text{mol}$ ),  $h$  is the effective layer depth of 19  $\mu\text{m}$ .  $N_A$  is the Avogadro constant.  $S_{MPY}$  is the area of each 4-MPY molecule ( $\sim 7 \times 10^{-7} \mu\text{m}^2$ ). By dividing the laser surface area by the cross-sectional area per molecule. Thus, we can then obtain  $N_{SERS}$  is  $9.70 \times 10^{10}$  and  $N_{Bulk}$  is  $1.12 \times 10^6$ . The in-plane at  $1576 \text{ cm}^{-1}$  was chosen for calculation of the enhancement factor because it is intense in both spectra and is isolated from interference with nearby lines. From the observed spectra (text Figure. 5a) we obtain for the ratio of intensities  $I_{SERS} / I_{Bulk} = 30624/193 = 158.6$ . The resulting EF is estimated to be  $1.36 \times 10^7$ .
